# Supplementary material
Source: HighWire-hosted journal article supplement (https://www.rcpjournals.org/highwire/filestream/12487/field_highwire_adjunct_files/1/Senn_supplementary_material_S2.pdf)
Supplement: Senn_supplementary_material_S2.pdf [file Senn_supplementary_material_S2.pdf]

## Exception reporting survey

1. Are you an FY1 or FY2?

Mark only one oval.

FY1

FY2

2. What is your current post?

---

3. In the last 2 months, how many exception reports have you submitted? (Roughly)

---

4. In the last 2 months how many times have you worked past the end of your shift? (Roughly)

---

5. How satisfied are you with the exception reporting process? (5 being completely satisfied)

Mark only one oval.

1    2    3    4    5

6. Has your consultant encouraged exception reporting?

Mark only one oval.

Yes

No

Other: \_\_\_\_\_

7. What length of overtime have you/would you exception report?

Tick all that apply.

< 30 minutes

30 minutes

45 minutes

1 hour

1 hour 30 minutes

2 hours +

None

8. If you have not exception reported, or not exception reported every time you worked overtime, why was this?

Tick all that apply.

I was worried I might be seen as "slow" or not doing my job efficiently

I don't think it makes any difference

It takes too long to exception report

I don't know how to submit an exception report

I don't know how long is an acceptable length of overtime to exception report

I felt pressurised not to exception report

I don't like having to have a meeting with my consultant to discuss it

I have been told I can't get payment for it

I haven't yet been paid for any of my reports

Insufficient senior encouragement

The rest of my team doesn't exception report

Other: \_\_\_\_\_

9. What would make you more likely to exception report?

---

---

---

---

10. Was the exception reporting guidance leaflet useful? Why/why not?

---
